# Supplementary material for: Different phase-dominated chiral assembly of polyfluorenes induced by chiral solvation: axial and supramolecular chirality
Source: Royal Society of Chemistry journal article supplement (doi:10.1039/c9ra08354e), 2019-01-01
Supplement: c9ra08354e1.pdf [file c9ra08354e1.pdf]

### Supporting Information for

## Different Phase Dominated Chiral Assembly of Polyfluorenes Induced by Chiral Solvation: Axial and Supramolecular Chirality

Shuai Li,<sup>a</sup> Tengfei Miao,<sup>a</sup> Xiaoxiao Cheng,<sup>a</sup> Yin Zhao,<sup>a</sup> Wei Zhang,<sup>\*a</sup> and Xiulin Zhu<sup>a,b</sup>

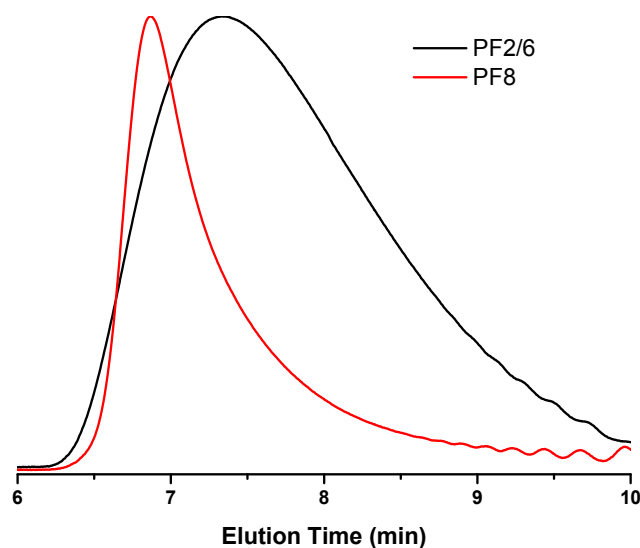

**Fig. S1** GPC curves of PFs.

**Tab. S1** Molecular mass characteristics of PFs.

| Entry | $M_n(\text{GPC})$<br>(g mol <sup>-1</sup> ) | $M_w(\text{GPC})$<br>(g mol <sup>-1</sup> ) | $M_w/M_n$ |
|-------|---------------------------------------------|---------------------------------------------|-----------|
| PF2/6 | 14,600                                      | 27,400                                      | 1.89      |
| PF8   | 34,900                                      | 45,300                                      | 1.30      |

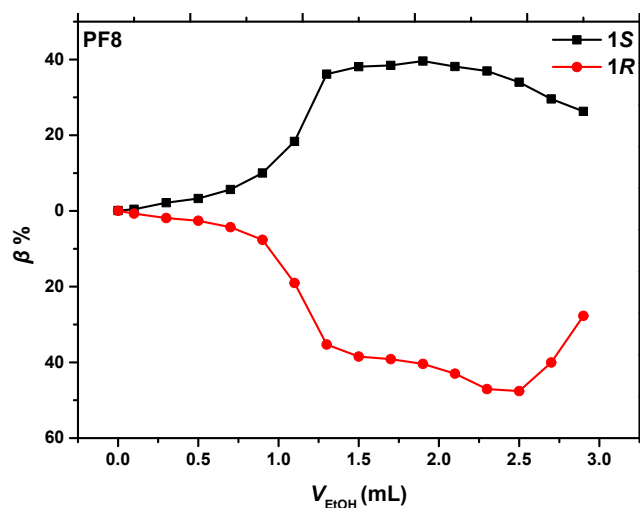

**Fig. S2**  $\beta$  phase contents of PF8 solution and aggregates in binary solvent with different (1S or 1R)/EtOH volume fractions. The concentration of polymer repeating units is  $5 \times 10^{-5} \text{ mol L}^{-1}$ . The content of  $\beta$ -conformation in PF8 solution and aggregates solution is calculated according to the previous report<sup>1</sup>.

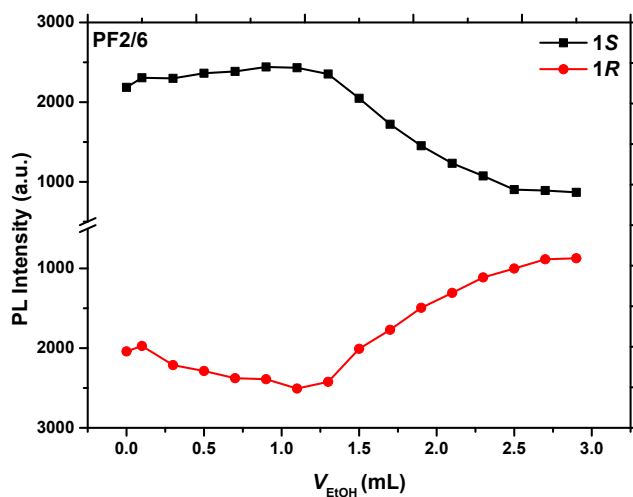

**Fig. S3** Plots of PL intensity maximum of PF2/6 solutions and aggregates in binary solvent with different (1S or 1R)/EtOH volume fractions. The concentration of polymer repeating units is  $5 \times 10^{-5} \text{ mol L}^{-1}$ .

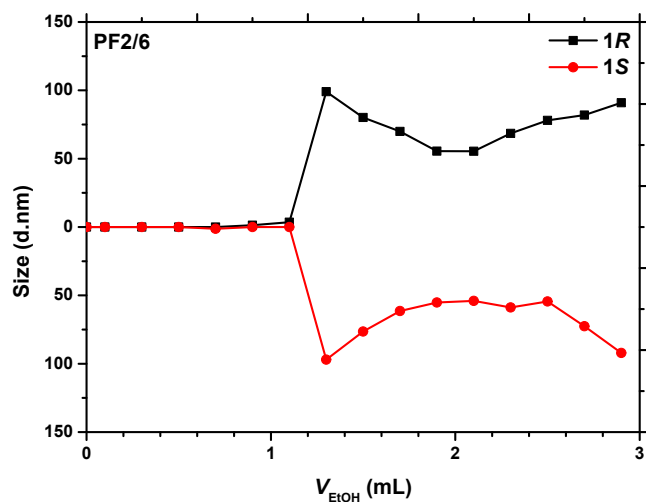

**Fig. S4** Plots of DLS of PF2/6 aggregates in binary solvent with different (1*S* or 1*R*)/EtOH volume fractions. The concentration of polymer repeating units is  $5 \times 10^{-5}$  mol L<sup>-1</sup>.

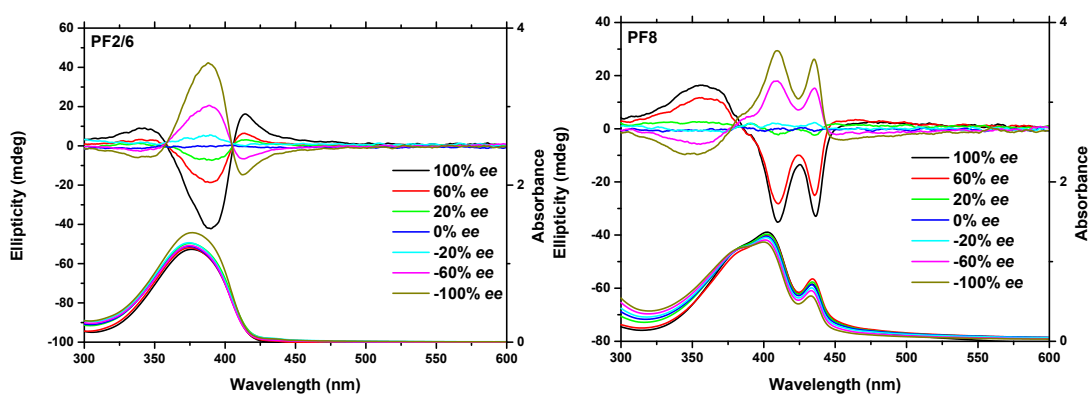

**Fig. S5** The changes in CD and UV-vis spectra of PF2/6 (left) and PF8 (right) aggregates in binary solvent with different enantiopurity of limonene. The volume fraction of (1*S* or 1*R*)/EtOH was 0.3/2.7. The concentration of polymer repeating units was  $5 \times 10^{-5}$  mol L<sup>-1</sup>.

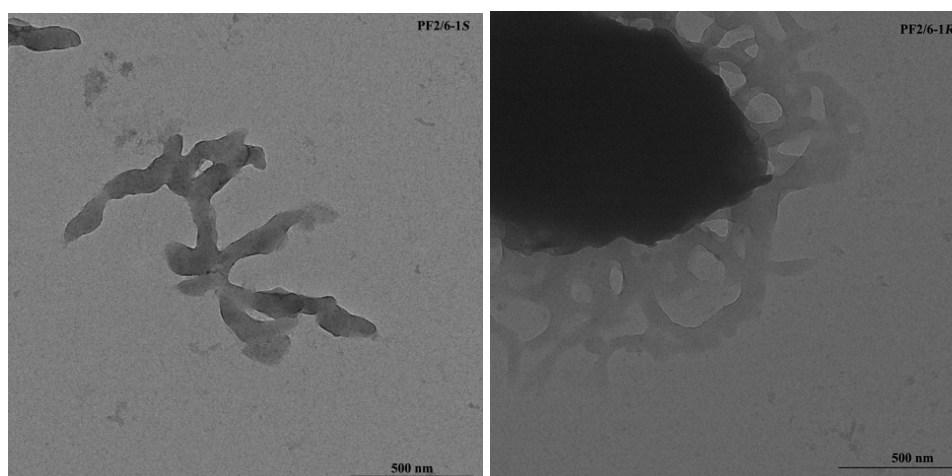

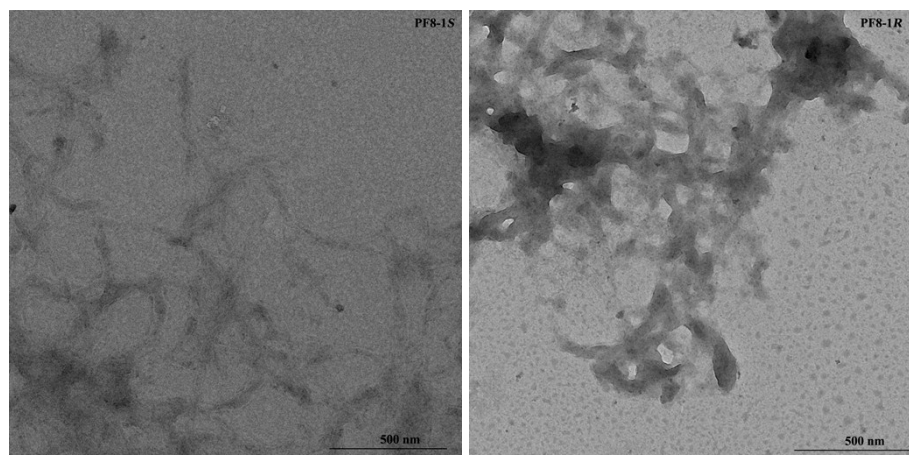

**Fig. S6** TEM images of PF2/6 (top) and PF8 (down) aggregates in binary solvent. The volume fraction of (1*S* or 1*R*)/EtOH was 0.3/2.7.

### Reference

1 L. Huang, T. Li, B. Liu, L. L. Zhang, Z. M. Bai, X. N. Li, X. N. Huang and D. Lu, *Soft Matter*, 2015, **11**, 2627-2638.
